# Supplementary material for: Geographical variation of Geochemistry and Bacteriome of Maize Rhizosphere in Agricultural Farmlands
Source: Research Square preprint supplement (doi:10.21203/rs.3.rs-3508732/v1), 2023-10-31
Supplement: Supplementary file 1 [file 513fc391ca318741449aa6b4.docx]

**Table A1**

**The GPS Coordinates of the sampling locations**

| **Locations** | **GPS Coordinates** | | |
| --- | --- | --- | --- |
|  | **Longitude** |  | **Latitude** |
| Ma2R | 6.152819 |  | 8.072157 |
| Ma3R | 6.255210 |  | 8.124860 |
| MF1A-R | 5.490398 |  | 11.398558 |
| MF2A-R | 5.4903982 |  | 11.3985579 |
| MF3A-R | 5.4894149 |  | 11.3961022 |
| BaMR | 6.266680 |  | 8.115752 |

**Relative abundance of 25 most abundant OTUs in the maize rhizosphere across the geographical locations**

| Name | Ma2R | Ma3R | MF1A-R | MF2A-R | MF3A-R | BaMR | Sum (Number) |
| --- | --- | --- | --- | --- | --- | --- | --- |
| Bacillus fumarioli group | 1403 | 266 | 3284 | 2211 | 1920 | 847 | 9931 |
| Bradyrhizobium japonicum group | 744 | 2043 | 514 | 380 | 738 | 2685 | 7104 |
| Streptomyces scabiei group | 849 | 539 | 589 | 606 | 662 | 2080 | 5325 |
| PAC002566_s | 865 | 904 | 273 | 90 | 170 | 1104 | 3406 |
| Bacillus_uc | 240 | 92 | 941 | 913 | 658 | 321 | 3165 |
| Oxalophagus oxalicus | 1133 | 172 | 502 | 325 | 244 | 354 | 2730 |
| Gaiella_uc | 1279 | 237 | 338 | 158 | 314 | 244 | 2570 |
| Bacillus niacini | 285 | 132 | 790 | 465 | 389 | 336 | 2397 |
| Bacillus megaterium group | 516 | 123 | 416 | 414 | 569 | 316 | 2354 |
| Bacillus asahii | 284 | 16 | 754 | 106 | 453 | 446 | 2059 |
| Kouleothrix_f_uc_s | 284 | 84 | 596 | 151 | 704 | 15 | 1834 |
| Mycobacterium farcinogenes group | 118 | 190 | 117 | 135 | 99 | 769 | 1428 |
| Sporosarcina koreensis group | 3 | 0 | 41 | 1359 | 3 | 17 | 1423 |
| Micromonospora chalcea group | 29 | 374 | 24 | 93 | 48 | 798 | 1366 |
| Ammoniphilus resinae | 143 | 3 | 635 | 65 | 332 | 127 | 1305 |
| Ktedonobacteraceae_uc_s | 142 | 860 | 65 | 39 | 75 | 111 | 1292 |
| Couchioplanes caeruleus group | 188 | 140 | 286 | 309 | 200 | 150 | 1273 |
| Microvirga_uc | 134 | 122 | 170 | 384 | 362 | 86 | 1258 |
| CP003078_s | 81 | 131 | 119 | 57 | 123 | 746 | 1257 |
| Microvirga subterranea group | 86 | 130 | 218 | 360 | 290 | 113 | 1197 |
| Sphingomonas lutea group | 146 | 228 | 230 | 171 | 151 | 174 | 1100 |
| Sporosarcina pasteurii | 0 | 0 | 4 | 1047 | 1 | 0 | 1052 |
| Microvirga lupini | 74 | 3 | 245 | 312 | 320 | 83 | 1037 |
| EU289467_g_uc | 191 | 110 | 199 | 180 | 224 | 95 | 999 |
| Geodermatophilus daqingensis | 99 | 74 | 223 | 168 | 210 | 197 | 971 |
