# Supplementary material for: Geographical variation of Geochemistry and Bacteriome of Maize Rhizosphere in Agricultural Farmlands
Source: Research Square preprint supplement (doi:10.21203/rs.3.rs-3508732/v1), 2023-10-31
Supplement: Supplementary file 5 [file f1b4a32360c3e1cfc26d92bc.docx]

**Table A2** Rhizobacteria OTUs of maize that was exclusively dominant in the hemispheres locations

|  | | **Southern hemisphere** | | |  | **Northern hemisphere** | | |  |
| --- | --- | --- | --- | --- | --- | --- | --- | --- | --- |
| Name | | BaMR | Ma3R | Ma2R |  | MF3A-R | MF2A-R | MF1A-R | Total |
| PAC001817_s | 12 | | 106 | 12 |  | 0 | 0 | 0 | 130 |
| PAC001792_s | 67 | | 38 | 23 |  | 0 | 0 | 0 | 128 |
| PAC002069_s | 4 | | 27 | 54 |  | 0 | 0 | 0 | 85 |
| Nocardia veterana group | 48 | | 7 | 8 |  | 0 | 0 | 0 | 63 |
| AY234546_s | 50 | | 8 | 2 |  | 0 | 0 | 0 | 60 |
| EF516777_s | 4 | | 54 | 1 |  | 0 | 0 | 0 | 59 |
| HM748719_s | 3 | | 48 | 3 |  | 0 | 0 | 0 | 54 |
| FJ538148_s | 12 | | 36 | 5 |  | 0 | 0 | 0 | 53 |
| JF189112_s | 33 | | 16 | 1 |  | 0 | 0 | 0 | 50 |
| EF516579_s | 12 | | 23 | 8 |  | 0 | 0 | 0 | 43 |
| FJ479378_g_uc | 6 | | 7 | 29 |  | 0 | 0 | 0 | 42 |
| Streptomyces sulfonofaciens | 11 | | 7 | 21 |  | 0 | 0 | 0 | 39 |
| HM362526_s | 23 | | 6 | 7 |  | 0 | 0 | 0 | 36 |
| PAC001819_s | 8 | | 20 | 7 |  | 0 | 0 | 0 | 35 |
| PAC002017_s | 1 | | 32 | 1 |  | 0 | 0 | 0 | 34 |
| HQ397496_g_uc | 4 | | 4 | 24 |  | 0 | 0 | 0 | 32 |
| PAC001013_s | 22 | | 7 | 1 |  | 0 | 0 | 0 | 30 |
| Dyella_uc | 21 | | 6 | 3 |  | 0 | 0 | 0 | 30 |
| PAC002435_g_uc | 2 | | 18 | 9 |  | 0 | 0 | 0 | 29 |
| AY770957_g_uc | 13 | | 14 | 2 |  | 0 | 0 | 0 | 29 |
| HQ697785_s | 5 | | 16 | 7 |  | 0 | 0 | 0 | 28 |
| Bacillus panaciterrae | 2 | | 25 | 1 |  | 0 | 0 | 0 | 28 |
| EU881265_s | 4 | | 22 | 2 |  | 0 | 0 | 0 | 28 |
| Terriglobus roseus group | 14 | | 4 | 9 |  | 0 | 0 | 0 | 27 |
| JF833550_s | 5 | | 13 | 9 |  | 0 | 0 | 0 | 27 |
| DQ395983_s | 3 | | 11 | 13 |  | 0 | 0 | 0 | 27 |
| PAC000031_s | 7 | | 18 | 1 |  | 0 | 0 | 0 | 26 |
| HQ190559_g_uc | 5 | | 10 | 11 |  | 0 | 0 | 0 | 26 |
| PAC002535_s | 2 | | 13 | 9 |  | 0 | 0 | 0 | 24 |
| Saccharopolyspora antimicrobica group | 9 | | 6 | 8 |  | 0 | 0 | 0 | 23 |
| EU335328_s | 5 | | 13 | 4 |  | 0 | 0 | 0 | 22 |
| EF516526_s | 5 | | 16 | 1 |  | 0 | 0 | 0 | 22 |
| AB308365_s | 1 | | 15 | 5 |  | 0 | 0 | 0 | 21 |
| PAC001827_s | 3 | | 14 | 4 |  | 0 | 0 | 0 | 21 |
| FNLG_s | 9 | | 8 | 1 |  | 0 | 0 | 0 | 18 |
| AY326614_s | 7 | | 5 | 5 |  | 0 | 0 | 0 | 17 |
| AM902596_s | 2 | | 5 | 9 |  | 0 | 0 | 0 | 16 |
| EU881289_s | 1 | | 7 | 8 |  | 0 | 0 | 0 | 16 |
| Risungbinella pyongyangensis group | 2 | | 2 | 11 |  | 0 | 0 | 0 | 15 |
| EU589308_f_uc_s | 2 | | 8 | 5 |  | 0 | 0 | 0 | 15 |
| PAC002540_s | 4 | | 7 | 4 |  | 0 | 0 | 0 | 15 |
| PAC002235_s | 1 | | 12 | 1 |  | 0 | 0 | 0 | 14 |
| AY673410_s | 1 | | 10 | 3 |  | 0 | 0 | 0 | 14 |
| AF244749_s | 3 | | 8 | 3 |  | 0 | 0 | 0 | 14 |
| EF032758_s | 1 | | 8 | 5 |  | 0 | 0 | 0 | 14 |
| HQ674971_g_uc | 5 | | 6 | 3 |  | 0 | 0 | 0 | 14 |
| FR687536_s | 7 | | 4 | 3 |  | 0 | 0 | 0 | 14 |
| AY960774_s | 2 | | 1 | 11 |  | 0 | 0 | 0 | 14 |
| PAC000432_s | 9 | | 1 | 3 |  | 0 | 0 | 0 | 13 |
| AB252912_s | 8 | | 2 | 3 |  | 0 | 0 | 0 | 13 |
| Bacillus thermolactis group | 1 | | 8 | 3 |  | 0 | 0 | 0 | 12 |
| GQ263402_s | 4 | | 1 | 7 |  | 0 | 0 | 0 | 12 |
| EF516176_s | 2 | | 2 | 8 |  | 0 | 0 | 0 | 12 |
| Anaerocolumna xylanovorans | 4 | | 7 | 1 |  | 0 | 0 | 0 | 12 |
| EU132684_s | 6 | | 2 | 4 |  | 0 | 0 | 0 | 12 |
| FJ889304_s | 1 | | 2 | 9 |  | 0 | 0 | 0 | 12 |
| Thermocatellispora tengchongensis | 3 | | 3 | 5 |  | 0 | 0 | 0 | 11 |
| PAC002435_s | 1 | | 9 | 1 |  | 0 | 0 | 0 | 11 |
| Moeniiplasma_o_uc_s | 5 | | 3 | 2 |  | 0 | 0 | 0 | 10 |
| Enterobacteriaceae group | 2 | | 3 | 5 |  | 0 | 0 | 0 | 10 |
| Acidisphaera rubrifaciens | 2 | | 5 | 3 |  | 0 | 0 | 0 | 10 |
| PAC002416_s | 4 | | 5 | 1 |  | 0 | 0 | 0 | 10 |
| PAC001854_s | 2 | | 5 | 2 |  | 0 | 0 | 0 | 9 |
| JF178544_s | 5 | | 3 | 1 |  | 0 | 0 | 0 | 9 |
| Pseudonocardia kongjuensis group | 7 | | 1 | 1 |  | 0 | 0 | 0 | 9 |
| GU172184_s | 3 | | 5 | 1 |  | 0 | 0 | 0 | 9 |
| EF516366_s | 4 | | 1 | 4 |  | 0 | 0 | 0 | 9 |
| Bacteroides xylanolyticus | 1 | | 6 | 1 |  | 0 | 0 | 0 | 8 |
| EU133208_s | 4 | | 2 | 2 |  | 0 | 0 | 0 | 8 |
| AB630777_s | 4 | | 1 | 3 |  | 0 | 0 | 0 | 8 |
| EU131926_s | 2 | | 4 | 2 |  | 0 | 0 | 0 | 8 |
| Saccharopolyspora gregorii group | 5 | | 1 | 2 |  | 0 | 0 | 0 | 8 |
| PAC001974_s | 1 | | 4 | 3 |  | 0 | 0 | 0 | 8 |
| JN540279_s | 1 | | 6 | 1 |  | 0 | 0 | 0 | 8 |
| EU134540_s | 1 | | 3 | 3 |  | 0 | 0 | 0 | 7 |
| Cohnella rhizosphaerae | 1 | | 5 | 1 |  | 0 | 0 | 0 | 7 |
| AB630611_s | 4 | | 2 | 1 |  | 0 | 0 | 0 | 7 |
| FJ625384_s | 1 | | 2 | 4 |  | 0 | 0 | 0 | 7 |
| JF027184_s | 3 | | 3 | 1 |  | 0 | 0 | 0 | 7 |
| HQ828050_s | 2 | | 2 | 3 |  | 0 | 0 | 0 | 7 |
| Paenibacillus amylolyticus group | 1 | | 2 | 4 |  | 0 | 0 | 0 | 7 |
| FJ466217_s | 3 | | 1 | 3 |  | 0 | 0 | 0 | 7 |
| AB247484_s | 3 | | 1 | 3 |  | 0 | 0 | 0 | 7 |
| DQ413078_s | 2 | | 2 | 2 |  | 0 | 0 | 0 | 6 |
| Azospirillum formosense | 1 | | 2 | 3 |  | 0 | 0 | 0 | 6 |
| AY234477_s | 1 | | 2 | 3 |  | 0 | 0 | 0 | 6 |
| EF516087_s | 3 | | 1 | 2 |  | 0 | 0 | 0 | 6 |
| Escherichia coli group | 3 | | 1 | 2 |  | 0 | 0 | 0 | 6 |
| GU208500_s | 3 | | 2 | 1 |  | 0 | 0 | 0 | 6 |
| HM748676_g_uc | 3 | | 2 | 1 |  | 0 | 0 | 0 | 6 |
| EF516859_s | 1 | | 1 | 4 |  | 0 | 0 | 0 | 6 |
| GQ406162_s | 2 | | 2 | 1 |  | 0 | 0 | 0 | 5 |
| FPEJ_s group | 1 | | 1 | 3 |  | 0 | 0 | 0 | 5 |
| LZKJ_s | 2 | | 1 | 1 |  | 0 | 0 | 0 | 4 |
| JN592663_s | 1 | | 2 | 1 |  | 0 | 0 | 0 | 4 |
| EF516838_s | 2 | | 1 | 1 |  | 0 | 0 | 0 | 4 |
| EU135158_s | 1 | | 2 | 1 |  | 0 | 0 | 0 | 4 |
| EF019963_s | 1 | | 2 | 1 |  | 0 | 0 | 0 | 4 |
| GU444092_s | 1 | | 1 | 1 |  | 0 | 0 | 0 | 3 |
| EF494371_s | 1 | | 1 | 1 |  | 0 | 0 | 0 | 3 |
| Sporosarcina pasteurii | 0 | | 0 | 0 |  | 1 | 1047 | 4 | 1052 |
| AM111065_s | 0 | | 0 | 0 |  | 1 | 573 | 2 | 576 |
| HQ645178_s | 0 | | 0 | 0 |  | 23 | 40 | 19 | 82 |
| Angustibacter aerolatus | 0 | | 0 | 0 |  | 8 | 1 | 52 | 61 |
| Herpetosiphonaceae_uc_s | 0 | | 0 | 0 |  | 43 | 4 | 6 | 53 |
| HE798165_g_uc | 0 | | 0 | 0 |  | 6 | 6 | 35 | 47 |
| Geodermatophilus siccatus | 0 | | 0 | 0 |  | 16 | 12 | 14 | 42 |
| DQ129292_s | 0 | | 0 | 0 |  | 2 | 34 | 3 | 39 |
| Naasia aerilata | 0 | | 0 | 0 |  | 23 | 14 | 1 | 38 |
| JQ426894_s | 0 | | 0 | 0 |  | 1 | 1 | 29 | 31 |
| Kineococcus aurantiacus group | 0 | | 0 | 0 |  | 2 | 18 | 9 | 29 |
| Paenibacillus yonginensis | 0 | | 0 | 0 |  | 2 | 21 | 1 | 24 |
| Planomonospora parontospora group | 0 | | 0 | 0 |  | 15 | 4 | 5 | 24 |
| Bacillus thermotolerans | 0 | | 0 | 0 |  | 7 | 13 | 1 | 21 |
| Y07578_s | 0 | | 0 | 0 |  | 5 | 11 | 3 | 19 |
| ANPE_s | 0 | | 0 | 0 |  | 10 | 6 | 2 | 18 |
| GQ906580_g_uc | 0 | | 0 | 0 |  | 3 | 4 | 10 | 17 |
| AY921900_s | 0 | | 0 | 0 |  | 12 | 1 | 4 | 17 |
| Dokdonella_uc | 0 | | 0 | 0 |  | 12 | 2 | 2 | 16 |
| FJ542874_s | 0 | | 0 | 0 |  | 3 | 11 | 1 | 15 |
| PAC000395_f_uc_s | 0 | | 0 | 0 |  | 2 | 4 | 9 | 15 |
| Phaselicystis_uc | 0 | | 0 | 0 |  | 4 | 9 | 2 | 15 |
| AB672266_s | 0 | | 0 | 0 |  | 2 | 5 | 8 | 15 |
| Bacillus thermoamylovorans group | 0 | | 0 | 0 |  | 10 | 2 | 2 | 14 |
| EU335161_f_uc_s | 0 | | 0 | 0 |  | 6 | 2 | 6 | 14 |
| JF123103_s | 0 | | 0 | 0 |  | 1 | 7 | 4 | 12 |
| Saccharopolyspora endophytica group | 0 | | 0 | 0 |  | 1 | 1 | 9 | 11 |
| JQ738743_s | 0 | | 0 | 0 |  | 2 | 2 | 7 | 11 |
| FJ152854_s | 0 | | 0 | 0 |  | 2 | 3 | 5 | 10 |
| AB286450_s | 0 | | 0 | 0 |  | 5 | 1 | 4 | 10 |
| HM186202_s | 0 | | 0 | 0 |  | 4 | 2 | 4 | 10 |
| JF171375_s | 0 | | 0 | 0 |  | 1 | 8 | 1 | 10 |
| Actinoplanes digitatis group | 0 | | 0 | 0 |  | 4 | 4 | 2 | 10 |
| AM697057_s | 0 | | 0 | 0 |  | 3 | 2 | 4 | 9 |
| AF465658_s | 0 | | 0 | 0 |  | 1 | 2 | 6 | 9 |
| Lapillicoccus jejuensis | 0 | | 0 | 0 |  | 1 | 2 | 6 | 9 |
| EU289454_s | 0 | | 0 | 0 |  | 3 | 5 | 1 | 9 |
| HQ674881_s | 0 | | 0 | 0 |  | 2 | 4 | 3 | 9 |
| EU276546_s | 0 | | 0 | 0 |  | 2 | 1 | 6 | 9 |
| Paucisalibacillus globulus group | 0 | | 0 | 0 |  | 1 | 5 | 2 | 8 |
| Actinomycetospora straminea group | 0 | | 0 | 0 |  | 1 | 3 | 4 | 8 |
| Caldilineales_uc_s | 0 | | 0 | 0 |  | 2 | 3 | 3 | 8 |
| AB533891_s | 0 | | 0 | 0 |  | 1 | 2 | 5 | 8 |
| HM061800_s | 0 | | 0 | 0 |  | 4 | 2 | 2 | 8 |
| EU979074_g_uc | 0 | | 0 | 0 |  | 4 | 2 | 2 | 8 |
| Kallotenuales_uc_s | 0 | | 0 | 0 |  | 4 | 2 | 2 | 8 |
| Ornithinibacillus halotolerans | 0 | | 0 | 0 |  | 6 | 1 | 1 | 8 |
| LAZU_s | 0 | | 0 | 0 |  | 3 | 1 | 3 | 7 |
| GQ263023_g_uc | 0 | | 0 | 0 |  | 4 | 1 | 2 | 7 |
| EF516199_s | 0 | | 0 | 0 |  | 2 | 1 | 4 | 7 |
| JF776887_s | 0 | | 0 | 0 |  | 1 | 1 | 5 | 7 |
| EU276570_s | 0 | | 0 | 0 |  | 3 | 1 | 3 | 7 |
| Nitrospira defluvii group | 0 | | 0 | 0 |  | 2 | 1 | 3 | 6 |
| AB618502_s | 0 | | 0 | 0 |  | 1 | 4 | 1 | 6 |
| DQ129312_s | 0 | | 0 | 0 |  | 2 | 2 | 2 | 6 |
| FJ936910_s | 0 | | 0 | 0 |  | 4 | 1 | 1 | 6 |
| AY234652_s | 0 | | 0 | 0 |  | 1 | 1 | 4 | 6 |
| JN037961_s | 0 | | 0 | 0 |  | 1 | 1 | 4 | 6 |
| JQMC_s | 0 | | 0 | 0 |  | 4 | 1 | 1 | 6 |
| EU134577_s | 0 | | 0 | 0 |  | 2 | 2 | 2 | 6 |
| JQ769816_s | 0 | | 0 | 0 |  | 2 | 2 | 1 | 5 |
| AB240246_s | 0 | | 0 | 0 |  | 1 | 2 | 2 | 5 |
| Falsibacillus pallidus | 0 | | 0 | 0 |  | 2 | 2 | 1 | 5 |
| GQ263952_s | 0 | | 0 | 0 |  | 2 | 1 | 2 | 5 |
| Paenibacillus validus | 0 | | 0 | 0 |  | 2 | 2 | 1 | 5 |
| HM061820_s | 0 | | 0 | 0 |  | 1 | 2 | 1 | 4 |
| HQ119899_s | 0 | | 0 | 0 |  | 1 | 1 | 1 | 3 |
| Oceanobacillus profundus group | 0 | | 0 | 0 |  | 1 | 1 | 1 | 3 |
| EU193045_s | 0 | | 0 | 0 |  | 1 | 1 | 1 | 3 |
| Weissella confusa group | 0 | | 0 | 0 |  | 1 | 1 | 1 | 3 |
