# Supplementary figures and images for: Geographical variation of Geochemistry and Bacteriome of Maize Rhizosphere in Agricultural Farmlands
Source: Research Square preprint supplement (doi:10.21203/rs.3.rs-3508732/v1), 2023-10-31

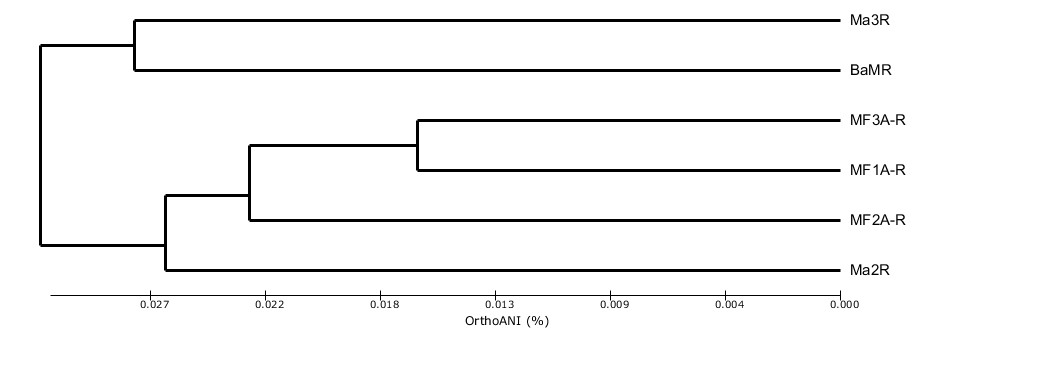

Supplement: Supplementary file 2 [file 71f883764198a8a8b11ebd0f.docx]
